# Supplementary material for: Identifying causation in hypersensitivity pneumonitis: a British perspective
Source: PubMed Central journal article supplement — BMJ Open Respir Res. 2019 Dec 3;6(1):e000469. doi: 10.1136/bmjresp-2019-000469 (PMC6890382; doi:10.1136/bmjresp-2019-000469), 2019-12-03
Supplement: bmjresp-2019-000469supp001.pdf [file bmjresp-2019-000469supp001.pdf]

**APPENDIX 1** – GB HP Survey participants (Participation rate was 78% for the MDT lead consultants and 37% for the other nominated MDT consultants, giving an overall participation rate of 49%.)

Huzaifa Adamali (Bristol)

Suresh Babu (Portsmouth)

Chris Barber (Sheffield).

Shaney Barrat (Bristol)

Alexander Basran (Sheffield)

Paul Beirne (Leeds)

Stephen Bianchi (Sheffield)

Sherwood Burge (Birmingham)

George Chalmers (Glasgow)

Nazia Chaudhuri (Manchester)

Sarah Davies (Llandudno)

Owen Dempsey (Aberdeen)

Sinan Eccles (Llantrisant)

Christine Fiddler (Cambridge)

Noleen Foley (Bath)

Ian Forrest (Newcastle)

Sophie Fletcher (Southampton)

Peter George (London)

Salman Ghani (Birmingham)

Michael Gibbons (Exeter)

Mike Greenstone (Hull)

Simon Hart (Hull)

Nick Hirani (Edinburgh)

Jennifer Hoyle (Manchester)

Rachel Hoyles (Oxford)

John Hutchinson (Nottingham)  
Gisli Jenkins (Nottingham)  
Eoin Judge (Liverpool)  
Ajay Kamath (Norwich)  
Maria Kokosi (London)  
Candy Lee (Larbert)  
Toby Maher (London)  
Ben Marshall (Southampton)  
Neil McAndrew (Wrexham)  
Philip Molyneux (London)  
Douglas Morrison (Larbert)  
Steve O'Hickey (Worcester)  
Helen Parfrey (Cambridge)  
Joanna Porter (London)  
Steve Renshaw (Sheffield)  
Elizabeth Renzoni (London)  
Charles Sharp (Bristol)  
Nicky Simler (Cambridge)  
Mark Spears (Larbert)  
Lisa Spencer (Liverpool)  
Alexander Spiers (Exeter)  
Katherine Spinks (Southampton)  
Monica Spiteri (Stoke)  
Chris Stenton (Newcastle)  
Sharon Sturney (Bath)  
Gareth Walters (Birmingham)  
Chris Warburton (Liverpool)  
Sarah Wiscombe (Newcastle)

Felix Woodhead (Leicester)
